# Supplementary material
Source: MDPI journal article supplement (https://www.mdpi.com/2071-1050/15/3/2843)
Supplement: s1 [file s1]

**Table S1.** Equations used for modeling sorption isotherms.

| Model      | Equation                                                             | Parameters                                                                                                                                                  | Ref. |
|------------|----------------------------------------------------------------------|-------------------------------------------------------------------------------------------------------------------------------------------------------------|------|
| Langmuir   | $q_{eq} = \frac{q_{m,L}C_{eq}}{1 + b_L C_{eq}}$                      | $q_{m,L}$ (mmol g <sup>-1</sup> ): Sorption capacity at saturation of monolayer<br>$b_L$ (L mmol <sup>-1</sup> ): Affinity coefficient                      | [1]  |
| Freundlich | $q_{eq} = k_F C_{eq}^{1/n_F}$                                        | $k_F$ and $n_F$ : empirical parameters of Freundlich equation                                                                                               | [2]  |
| Sips       | $q_{eq} = \frac{q_{m,s} b_s C_{eq}^{1/n_s}}{1 + b_s C_{eq}^{1/n_s}}$ | $q_{s,L}$ , $b_s$ and $n_s$ : empirical parameters of Sips equation<br>Sorption capacity at saturation, Affinity coefficient and Sips constant respectively | [3]  |

**Table S2.** Equations used for modeling uptake kinetics.

| Model | Equation                                                                                                                                                                                                                                                                                         | Parameters                                                                                                                                               | Ref. |
|-------|--------------------------------------------------------------------------------------------------------------------------------------------------------------------------------------------------------------------------------------------------------------------------------------------------|----------------------------------------------------------------------------------------------------------------------------------------------------------|------|
| PFORE | $q(t) = q_{eq,1}(1 - e^{-k_1 t})$                                                                                                                                                                                                                                                                | $q_{eq,1}$ (mmol g <sup>-1</sup> ): sorption capacity at equilibrium<br>$k_1$ (min <sup>-1</sup> ): apparent rate constant of PFORE                      | [4]  |
| PSORE | $q(t) = \frac{q_{eq,2}^2 k_2 t}{1 + k_2 q_{eq,2} t}$                                                                                                                                                                                                                                             | $q_{eq,2}$ (mmol g <sup>-1</sup> ): sorption capacity at equilibrium<br>$k_2$ (g mmol <sup>-1</sup> min <sup>-1</sup> ): apparent rate constant of PSORE | [4]  |
| RIDE  | $\frac{q(t)}{q_{eq}} = 1 - \sum_{n=1}^{\infty} \frac{6\alpha(\alpha + 1)\exp\left(\frac{-D_e q_n^2}{r^2} t\right)}{9 + 9\alpha + q_n^2 \alpha^2}$<br>With $q_n$ being the non-zero roots of<br>$\tan q_n = \frac{3 q_n}{3 + \alpha q_n^2} \text{ and } \frac{m q}{V C_0} = \frac{1}{1 + \alpha}$ | $D_e$ (m <sup>2</sup> min <sup>-1</sup> ): Effective diffusivity coefficient                                                                             | [5]  |

(m (g): mass of sorbent; V (L): volume of solution;  $C_0$  (mmol L<sup>-1</sup>): initial concentration of the solution);  $r^2$  radius of polymer particle.

Akaike Information Criterion, AIC:

$$AIC = N \ln \left( \frac{\sum_{i=0}^N (y_{i,exp.} - y_{i,model})^2}{N} \right) + 2N_p + \frac{2N_p(N_p + 1)}{N - N_p - 1}$$

Where N is the number of experimental points,  $N_p$  the number of model parameters,  $y_{i,exp.}$  and  $y_{i,model}$  the experimental and calculated values of the tested variable.

**Table S3.** Constituents of leaching solution before used for U removal at (pH=0.3)

| Constituent | Conc. (mg/L) | Constituent                    | Conc. (mg/L) |
|-------------|--------------|--------------------------------|--------------|
| U           | 530          | Al <sub>2</sub> O <sub>3</sub> | 2510         |
| REE         | 410          | Pb                             | 20.8         |
| Fe          | 2300         | Zr                             | 29.5         |

**Table S4.** FTIR assignments of peaks for PGEG, TBP-PGEG, after loading with La and after 5 cycles of sorption desorption.

| Vibration                                                       | Ref.            | PGEG | PGEG+L<br>a | PGEG+5<br>cycles | TBP-<br>PGEG  | TBP-<br>PGEG+La | TBP-<br>PGEG+5<br>cycles |
|-----------------------------------------------------------------|-----------------|------|-------------|------------------|---------------|-----------------|--------------------------|
| N-H & O-H str.(overlapped)                                      | [6-12]          | 3439 | 3464        | 3452             | 3398          | 3439            | 3442                     |
| C-H str. (aliphatic)                                            | [13-16]         | 2931 | 2922        | 2929             | 2926,<br>2858 | 2922, 2850      | 2939                     |
| C(=O) O str.                                                    | [13,17,18]      |      |             |                  | 1708          |                 | 1745                     |
| C=O (amide)/(-C=N-) str. & 1°/2°<br>NH bend. (overlap)          | [19-23]         | 1631 | 1631        | 1631             | 1517          | 1681            | 1558                     |
| P=O (asym. Str.), C-H bend.<br>/CH <sub>2</sub> -N <sup>+</sup> | [24-28]         |      |             |                  | 1404          | 1465            | 1413                     |
| 1°/2° OH bend. (in-plane)                                       | [19,29]         | 1103 | 1105        | 1097             | 1172          | 1074            | 1168                     |
| C-O-C, C-O & C-C str.                                           | [19,30,31]      |      |             |                  |               | 1032            | 1071,1035                |
| P-O-C str.                                                      | [26]            |      |             |                  | 898           |                 | 898                      |
| C-N str.                                                        | [32-34]         | 805  | 794         | 800              | 842           | 887(overlap)    | (overlap)                |
| P-O-C str.<br>Fe-O                                              | [35]<br>[36,37] | 470  | 470         | 470              | 611           | broad           | 615                      |

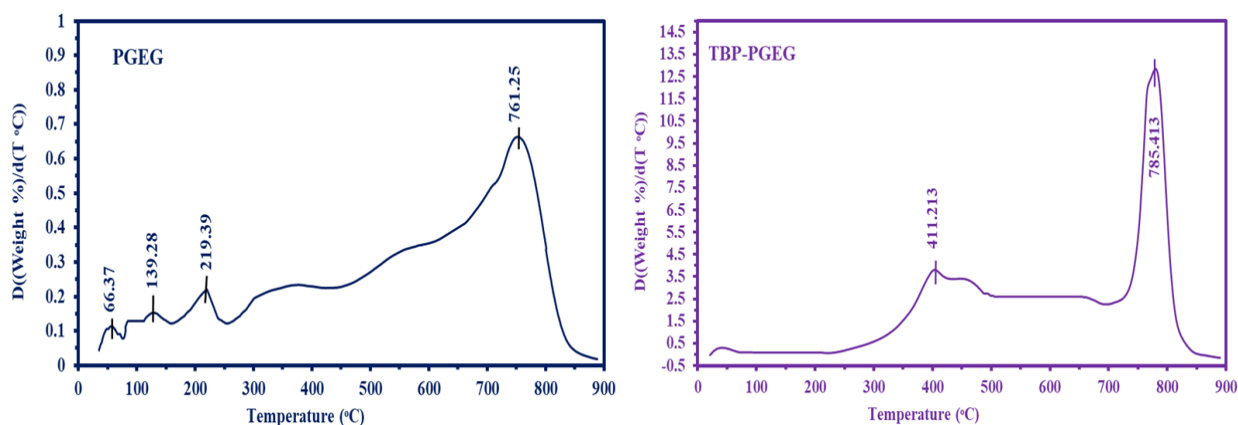**Figure S1.** Dr-TG analysis of the PGEG and TBP-PGEG sorbents

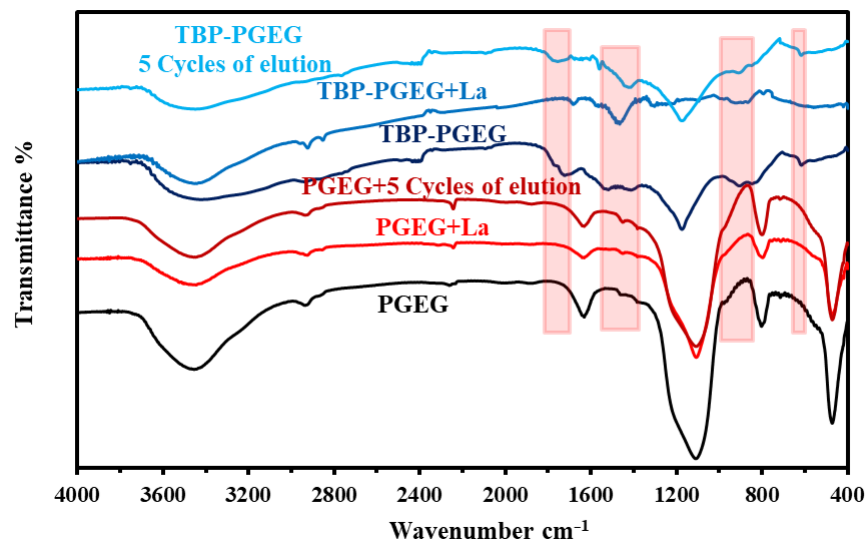

Figure S2. FTIR of collected spectra focusing on the main peaks.

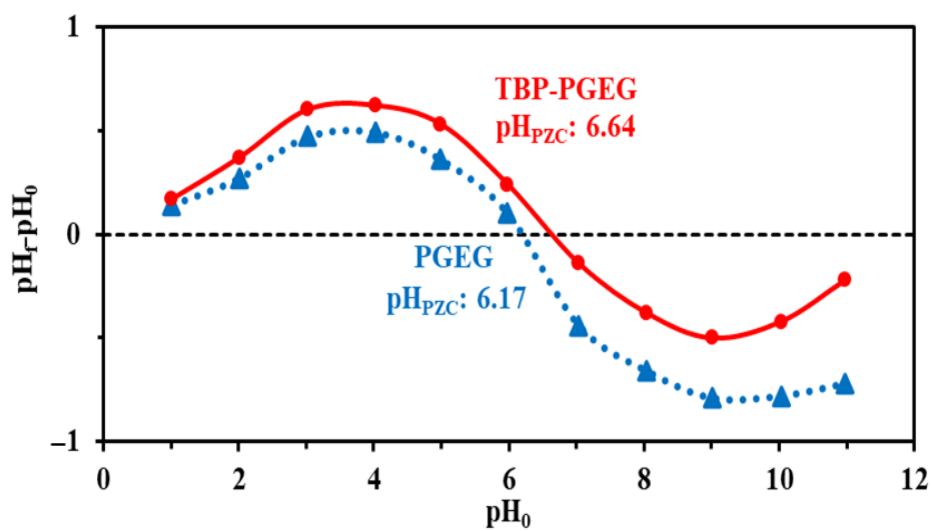

Figure S3.  $\text{pH}_{\text{PZC}}$  values of the PGEG and TBP-PGEG sorbents

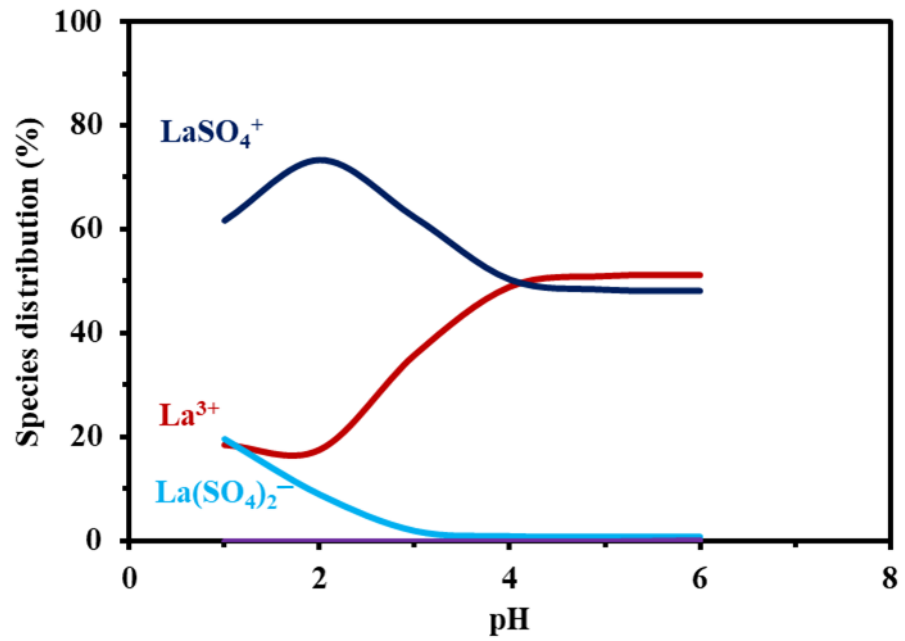

Figure S4. Speciation of La at different pH values

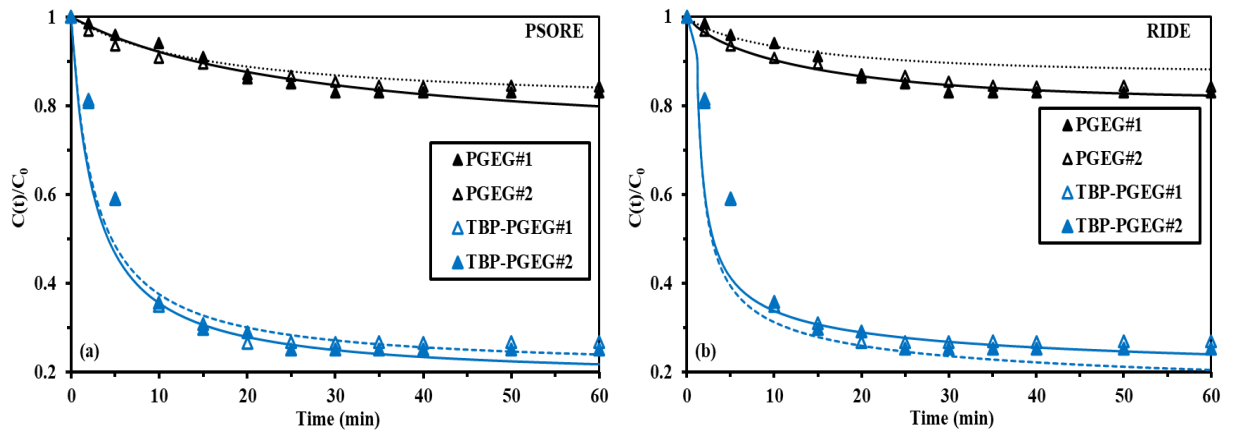

Figure S5. PSORE (a) and RIDE (b) fitting curves of PGEG and TBP-PGEG sorbents

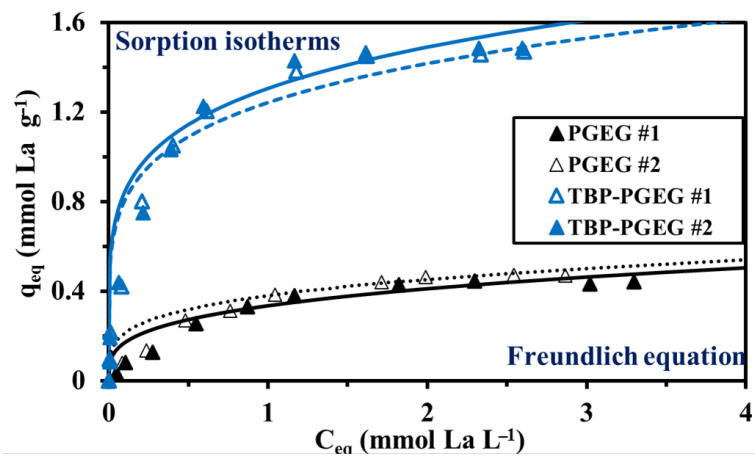

Figure S6. Freundlich equation fitting curves for the sorption isotherms of La(III) ions on PGEG and TBP-PGEG sorbents

---

## References

1. Tien, C. *Adsorption Calculations and Modeling*; Butterworth-Heinemann: Newton, MA, 1994; p. 243.
2. Lima, É.C.; Dehghani, M.H.; Guleria, A.; Sher, F.; Karri, R.R.; Dotto, G.L.; Tran, H.N. CHAPTER 3 - Adsorption: Fundamental aspects and applications of adsorption for effluent treatment. In *Green Technologies for the Defluoridation of Water*, Hadi Dehghani, M., Karri, R., Lima, E., Eds.; Elsevier: 2021; pp. 41-88.
3. Buema, G.; Lupu, N.; Chiriac, H.; Ciobanu, G.; Bucur, R.D.; Bucur, D.; Favier, L.; Harja, M. Performance assessment of five adsorbents based on fly ash for removal of cadmium ions. *Journal of Molecular Liquids* **2021**, 333, 115932, doi:10.1016/j.molliq.2021.115932.
4. Ho, Y.S.; McKay, G. Pseudo-second order model for sorption processes. *Process Biochem.* **1999**, 34, 451-465, doi:10.1016/S0032-9592(98)00112-5.
5. Crank, J. *The Mathematics of Diffusion*, 2nd. ed.; Oxford University Press: Oxford, U.K., 1975; p. 414.
6. Hamza, M.F.; Guibal, E.; Althumayri, K.; Vincent, T.; Yin, X.; Wei, Y.; Li, W. New Process for the Sulfonation of Algal/PEI Biosorbent for Enhancing Sr (II) Removal from Aqueous Solutions—Application to Seawater. *Molecules* **2022**, 27, 7128.
7. Fouda, A.; Hassan, S.E.-D.; Eid, A.M.; Awad, M.A.; Althumayri, K.; Badr, N.F.; Hamza, M.F. Endophytic bacterial strain, *Brevibacillus brevis*-mediated green synthesis of copper oxide nanoparticles, characterization, antifungal, in vitro cytotoxicity, and larvicidal activity. *Green Processing and Synthesis* **2022**, 11, 931-950.
8. Fouda, A.; Hamza, M.F.; Shaheen, T.I.; Wei, Y. Nanotechnology and smart textiles: Sustainable developments of applications. *Frontiers in Bioengineering and Biotechnology* **2022**, 10.
9. Amin, M.A.; Ismail, M.A.; Badawy, A.A.; Awad, M.A.; Hamza, M.F.; Awad, M.F.; Fouda, A. The Potency of fungal-fabricated selenium nanoparticles to improve the growth performance of *Helianthus annuus* L. and control of cutworm *Agrotis ipsilon*. *Catalysts* **2021**, 11, 1551.
10. Hassan, S.E.-D.; Fouda, A.; Saied, E.; Farag, M.M.; Eid, A.M.; Barghoth, M.G.; Awad, M.A.; Hamza, M.F.; Awad, M.F. *Rhizopus Oryzae*-mediated green synthesis of magnesium oxide nanoparticles (MgO-NPs): A promising tool for antimicrobial, mosquitocidal action, and tanning effluent treatment. *Journal of Fungi* **2021**, 7, 372.
11. Fouda, A.; Eid, A.M.; Guibal, E.; Hamza, M.F.; Hassan, S.E.-D.; Alkhalifah, D.H.M.; El-Hossary, D. Green Synthesis of Gold Nanoparticles by Aqueous Extract of *Zingiber officinale*: Characterization and Insight into Antimicrobial, Antioxidant, and In Vitro Cytotoxic Activities. *Applied Sciences* **2022**, 12, 12879.
12. Fouda, A.; Hassan, S.E.-D.; Saied, E.; Hamza, M.F. Photocatalytic degradation of real textile and tannery effluent using biosynthesized magnesium oxide nanoparticles (MgO-NPs), heavy metal adsorption, phytotoxicity, and antimicrobial activity. *Journal of Environmental Chemical Engineering* **2021**, 9, 105346.
13. Coates, J. Interpretation of Infrared Spectra, A Practical Approach. In *Encyclopedia of Analytical Chemistry*; John Wiley & Sons, Ltd.: 2006; pp. 1-23.
14. Fouda, A.; Hassan, S.E.-D.; Eid, A.M.; Abdel-Rahman, M.A.; Hamza, M.F. Light enhanced the antimicrobial, anticancer, and catalytic activities of selenium nanoparticles fabricated by endophytic fungal strain, *Penicillium crustosum* EP-1. *Scientific Reports* **2022**, 12, 1-16.
15. Hamza, M.F.; Khalafalla, M.S.; Wei, Y.; Hamad, N.A. Effect of bi-functionalization silica micro beads on uranium adsorption from synthetic and washing pregnant uranyl solutions. *Journal of Radioanalytical and Nuclear Chemistry* **2021**, 330, 191-206.
16. Hamza, M.F.; El Aassy, I.E. Solid phase extraction of uranium removal from underground water, Wadi Naseib, Southwestern Sinai, Egypt. *Desalination and Water Treatment* **2014**, 52, 331-338.
17. Fouda, A.; Awad, M.A.; Eid, A.M.; Saied, E.; Barghoth, M.G.; Hamza, M.F.; Awad, M.F.; Abdelbary, S.; Hassan, S.E.-D. An eco-friendly approach to the control of pathogenic microbes and *Anopheles stephensi* malarial vector using magnesium oxide nanoparticles (Mg-nps) fabricated by *Penicillium chrysogenum*. *International Journal of Molecular Sciences* **2021**, 22, 5096.

- 
18. Hamza, M.F. Removal of uranium (VI) from liquid waste of calcareous shale, Allouga, southwestern Sinai, Egypt. *Desalination and Water Treatment* **2015**, *54*, 2530-2540.
  19. Coates, J. Interpretation of Infrared Spectra, A Practical Approach. In *Encyclopedia of Analytical Chemistry*, Meyers, R.A., Ed.; John Wiley & Sons Ltd: Chichester, U.K., 2000; pp. 10815-10837.
  20. Mohammadi, N.; Ganesan, A.; Chantler, C.T.; Wang, F. Differentiation of ferrocene D5d and D5h conformers using IR spectroscopy. *Journal of Organometallic Chemistry* **2012**, *713*, 51-59.
  21. Chen, Y.; Geng, J.; Zhuang, Y.; Zhao, J.; Chu, L.; Luo, X.; Zhao, Y.; Guo, Y. Preparation of the chitosan grafted poly (quaternary ammonium)/Fe<sub>3</sub>O<sub>4</sub> nanoparticles and its adsorption performance for food yellow 3. *Carbohydrate Polymers* **2016**, *152*, 327-336, doi:10.1016/j.carbpol.2016.06.114.
  22. Fouda, A.; Eid, A.M.; Abdel-Rahman, M.A.; El-Belely, E.F.; Awad, M.A.; Hassan, S.E.-D.; Al-Faifi, Z.E.; Hamza, M.F. Enhanced antimicrobial, cytotoxicity, larvicidal, and repellence activities of brown algae, cystoseira crinita-mediated green synthesis of magnesium oxide nanoparticles. *Frontiers in Bioengineering and Biotechnology* **2022**, *10*.
  23. Hamza, M.F. Uranium recovery from concentrated chloride solution produced from direct acid leaching of calcareous shale, Allouga ore materials, southwestern Sinai, Egypt. *Journal of Radioanalytical and Nuclear Chemistry* **2018**, *315*, 613-626.
  24. Lord, R.C. Introduction to Infrared and Raman Spectroscopy. *Journal of the American Chemical Society* **1965**, *87*, 1155-1156.
  25. Hu, X.-j.; Wang, J.-s.; Liu, Y.-g.; Li, X.; Zeng, G.-m.; Bao, Z.-l.; Zeng, X.-x.; Chen, A.-w.; Long, F. Adsorption of chromium (VI) by ethylenediamine-modified cross-linked magnetic chitosan resin: isotherms, kinetics and thermodynamics. *Journal of hazardous materials* **2011**, *185*, 306-314.
  26. Lin-Vien, D.; Colthup, N.B.; Fateley, W.G.; Grasselli, J.G. CHAPTER 16 - Organophosphorus Compounds. In *The Handbook of Infrared and Raman Characteristic Frequencies of Organic Molecules*, Lin-Vien, D., Colthup, N.B., Fateley, W.G., Grasselli, J.G., Eds.; Academic Press: San Diego, 1991; pp. 263-276.
  27. Hamza, M.F.; Wei, Y.; Khalafalla, M.S.; Abed, N.S.; Fouda, A.; Elwakeel, K.Z.; Guibal, E.; Hamad, N.A. U (VI) and Th (IV) recovery using silica beads functionalized with urea-or thiourea-based polymers—Application to ore leachate. *Science of the Total Environment* **2022**, *821*, 153184.
  28. Dai, X.; Nhung, N.T.H.; Hamza, M.F.; Guo, Y.; Chen, L.; He, C.; Ning, S.; Wei, Y.; Dodbiba, G.; Fujita, T. Selective adsorption and recovery of scandium from red mud leachate by using phosphoric acid pre-treated pitaya peel biochar. *Separation and Purification Technology* **2022**, *292*, 121043.
  29. Fouda, A.; Salem, S.S.; Wassel, A.R.; Hamza, M.F.; Shaheen, T.I. Optimization of green biosynthesized visible light active CuO/ZnO nano-photocatalysts for the degradation of organic methylene blue dye. *Heliyon* **2020**, *6*, e04896.
  30. Zhao, Z.; Xie, X.; Wang, Z.; Tao, Y.; Niu, X.; Huang, X.; Liu, L.; Li, Z. Immobilization of *Lactobacillus rhamnosus* in mesoporous silica-based material: An efficiency continuous cell-recycle fermentation system for lactic acid production. *J. Biosci. Bioeng.* **2016**, *121*, 645-651.
  31. Hamza, M.F.; Adel, A.-H.; Hawata, M.A.; El Araby, R.; Guibal, E.; Fouda, A.; Wei, Y.; Hamad, N.A. Functionalization of magnetic chitosan microparticles—Comparison of trione and trithione grafting for enhanced silver sorption and application to metal recovery from waste X-ray photographic films. *Journal of Environmental Chemical Engineering* **2022**, 107939.
  32. Hamza, M.F.; Goda, A.E.-S.; Ning, S.; Mira, H.I.; Abdel-Rahman, A.A.-H.; Wei, Y.; Fujita, T.; Amer, H.H.; Alotaibi, S.H.; Fouda, A. Photocatalytic Efficacy of Heterocyclic Base Grafted Chitosan Magnetite Nanoparticles on Sorption of Pb (II); Application on Mining Effluent. *Catalysts* **2022**, *12*, 330.
  33. Hamza, M.F.; Mira, H.; Wei, Y.; Aboelenin, S.M.; Guibal, E.; Salem, W.M. Sulfonation of chitosan for enhanced sorption of Li (I) from acidic solutions—Application to metal recovery from waste Li-ion mobile battery. *Chemical Engineering Journal* **2022**, *441*, 135941.

- 
34. Fouda, A.; Awad, M.A.; AL-Faifi, Z.E.; Gad, M.E.; Al-Khalaf, A.A.; Yahya, R.; Hamza, M.F. Aspergillus flavus-Mediated Green Synthesis of Silver Nanoparticles and Evaluation of Their Antibacterial, Anti-Candida, Acaricides, and Photocatalytic Activities. *Catalysts* **2022**, *12*, 462.
  35. Hamza, M.F.; Salih, K.A.; Zhou, K.; Wei, Y.; Khoziem, H.A.A.; Alotaibi, S.H.; Guibal, E. Effect of bi-functionalization of algal/polyethyleneimine composite beads on the enhancement of tungstate sorption: Application to metal recovery from ore leachate. *Separation and Purification Technology* **2022**, *290*, 120893.
  36. Zahra, M.H.; Hamza, M.F.; El-Habibi, G.; Abdel-Rahman, A.A.-H.; Mira, H.I.; Wei, Y.; Alotaibi, S.H.; Amer, H.H.; Goda, A.E.-S.; Hamad, N.A. Synthesis of a Novel Adsorbent Based on Chitosan Magnetite Nanoparticles for the High Sorption of Cr (VI) ions: A Study of Photocatalysis and Recovery on Tannery Effluents. *Catalysts* **2022**, *12*, 678.
  37. Hamza, M.F.; Hamad, D.M.; Hamad, N.A.; Adel, A.-H.; Fouda, A.; Wei, Y.; Guibal, E.; El-Etrawy, A.-A.S. Functionalization of magnetic chitosan microparticles for high-performance removal of chromate from aqueous solutions and tannery effluent. *Chemical Engineering Journal* **2022**, *428*, 131775.
